# Supplementary material for: In Silico Analysis of Functional Single Nucleotide Polymorphisms in the Human TRIM22 Gene
Source: PubMed Central journal article supplement (PMC4077803; doi:10.1371/journal.pone.0101436), 2014-07-01
Supplement: pone.0101436.s001.pdf [file pone.0101436.s001.pdf]

# ConSurf Results

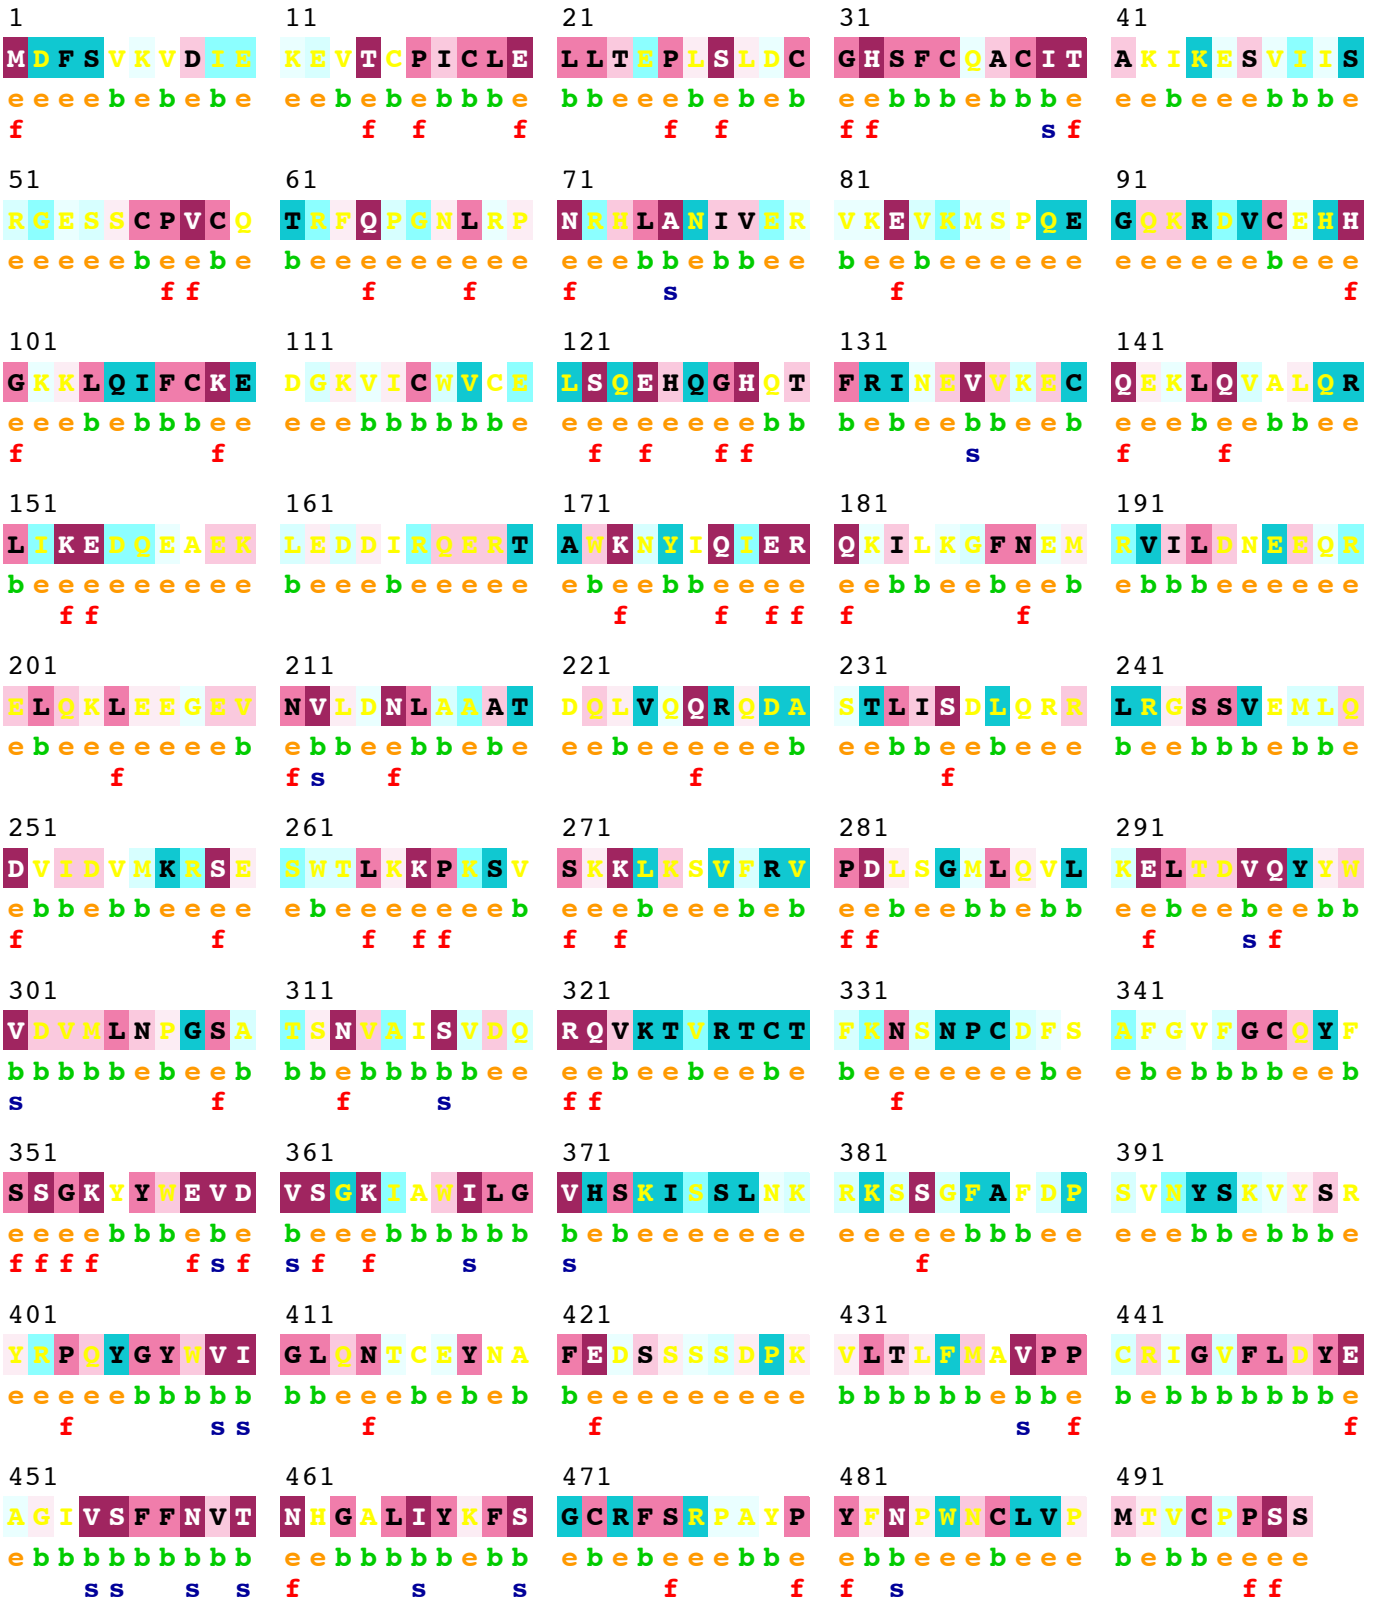

The conservation scale:

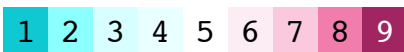

Variable Average Conserved
