# Supplementary material for: In Silico Analysis of Functional Single Nucleotide Polymorphisms in the Human TRIM22 Gene
Source: PubMed Central journal article supplement (PMC4077803; doi:10.1371/journal.pone.0101436), 2014-07-01
Supplement: pone.0101436.s002.pdf [file pone.0101436.s002.pdf]

# ConSurf Color-Coded MSA

|                |   |   |   |   |   |   |   |   |   |   |   |   |   |   |   |   |   |   |   |   |   |   |   |   |   |   |   |   |   |   |   |   |   |   |   |   |   |   |   |   |   |   |   |   |   |   |   |   |   |   |   |   |   |
|----------------|---|---|---|---|---|---|---|---|---|---|---|---|---|---|---|---|---|---|---|---|---|---|---|---|---|---|---|---|---|---|---|---|---|---|---|---|---|---|---|---|---|---|---|---|---|---|---|---|---|---|---|---|---|
| <u>Human</u>   | M | D | F | S | V | K | V | D | I | E | K | E | V | T | C | P | I | C | L | E | L | L | T | E | P | L | S | L | D | C | G | H | S | F | C | Q | A | C | I | T | A | K | I | K | E | - | - | S | V | I |   |   |   |
| Panda          | M | D | F | P | A | Q | V | N | I | Q | K | D | V | T | C | P | I | C | L | E | L | L | T | M | P | L | S | L | D | C | G | H | S | F | C | Q | A | C | I | T | A | K | S | K | E | - | - | S | G | T |   |   |   |
| Baboon         | M | D | F | S | V | K | V | D | I | E | K | E | V | T | C | P | I | C | L | E | L | L | T | E | P | L | S | L | D | C | G | H | S | F | C | Q | A | C | I | T | A | K | I | K | E | - | - | S | V | T |   |   |   |
| Gibbon         | M | D | F | S | V | K | V | D | I | E | K | E | V | T | C | P | I | C | L | E | L | L | T | E | P | L | S | L | D | C | G | H | S | F | C | Q | A | C | I | T | A | K | I | K | E | - | - | S | V | I |   |   |   |
| SquirrelMonkey | M | E | L | S | V | K | V | D | I | G | K | E | V | T | C | P | I | C | L | E | L | L | T | E | D | P | L | S | I | D | C | G | H | S | F | C | H | A | C | I | T | A | K | N | K | - | - | S | V | I |   |   |   |
| Rhino          | M | D | L | Q | A | Q | V | N | L | Q | K | E | V | T | C | P | I | C | L | E | L | L | T | E | P | L | S | L | G | C | G | H | S | F | C | K | A | C | I | T | A | K | N | K | E | - | - | S | V | I |   |   |   |
| Dog            | M | D | F | P | A | Q | A | N | I | Q | K | D | V | T | C | P | I | C | L | E | L | L | T | M | P | L | S | L | D | C | G | H | S | F | C | Q | A | C | I | T | A | K | S | M | E | - | - | S | G | T |   |   |   |
| Cat            | M | D | F | L | A | Q | V | N | L | K | R | E | L | T | Y | P | I | C | L | E | L | L | T | E | P | L | S | L | X | C | G | H | T | F | C | X | D | C | I | T | A | K | N | R | D | - | - | - | S | - | - | - | S |
| Manatee        | - | M | A | S | V | Q | A | N | I | E | K | E | V | T | C | P | I | C | L | E | L | L | T | K | P | L | S | L | N | C | G | H | S | F | C | Q | A | C | I | T | A | K | N | V | E | L | Q | T | V | I |   |   |   |
| RhesusMacaque  | M | D | F | S | V | K | V | D | I | E | K | E | V | T | C | P | I | C | L | E | L | L | T | E | P | L | S | L | D | C | G | H | S | F | C | Q | A | C | I | T | A | K | I | K | E | - | - | S | V | T |   |   |   |
| Elephant       | M | A | S | K | I | L | V | N | L | E | E | G | A | T | C | P | I | C | L | E | L | L | M | E | P | I | S | L | D | C | G | H | S | F | C | Q | A | C | I | T | A | D | N | K | K | - | - | S | M | V |   |   |   |
| Orangutan      | M | D | F | S | V | K | V | D | I | E | K | E | V | T | C | P | I | C | L | E | L | L | T | E | P | L | S | L | D | C | G | H | S | F | C | Q | A | C | I | T | A | K | I | K | E | - | - | S | V | I |   |   |   |
| Gorilla        | M | D | F | S | V | K | V | D | I | E | K | E | V | T | C | P | I | C | L | E | L | L | T | E | P | L | S | L | D | C | G | H | S | F | C | Q | A | C | I | T | A | K | I | K | E | - | - | S | V | I |   |   |   |
| Chimpanzee     | M | D | F | S | V | K | V | D | I | E | K | E | V | T | C | P | I | C | L | E | L | L | T | E | P | L | S | L | D | C | G | H | S | F | C | Q | A | C | I | T | T | K | I | K | E | - | - | S | V | I |   |   |   |

|                |   |   |   |   |   |   |   |   |   |   |   |   |   |   |   |   |   |   |   |   |   |   |   |   |   |   |   |   |   |   |   |   |   |   |   |   |   |   |   |   |   |   |   |   |   |   |   |   |   |   |
|----------------|---|---|---|---|---|---|---|---|---|---|---|---|---|---|---|---|---|---|---|---|---|---|---|---|---|---|---|---|---|---|---|---|---|---|---|---|---|---|---|---|---|---|---|---|---|---|---|---|---|---|
| <u>Human</u>   | I | S | R | G | E | S | S | C | P | V | C | Q | T | R | F | Q | P | G | N | L | R | P | N | R | H | L | A | N | I | V | E | R | V | K | E | V | K | M | S | P | Q | E | G | Q | K | R | D | V | C | E |
| Panda          | H | K | G | G | E | S | N | C | P | V | C | Q | C | K | Y | Q | F | W | N | L | R | P | N | Q | P | L | A | N | I | V | K | K | V | R | E | N | M | - | - | - | S | P | Q | Q | K | K | L | C | K |   |
| Baboon         | I | S | R | G | E | S | S | C | P | V | C | Q | S | R | F | Q | P | G | K | L | R | P | N | R | H | L | A | N | I | V | E | R | V | K | E | V | K | M | S | P | Q | E | G | Q | K | R | D | I | C | E |
| Gibbon         | I | S | R | G | E | S | S | C | P | V | C | Q | T | R | F | Q | P | G | N | L | R | P | N | R | H | L | A | N | I | V | E | R | V | K | E | V | K | M | S | P | Q | E | G | Q | K | R | D | V | C | E |
| SquirrelMonkey | I | S | G | G | Q | S | S | C | P | V | C | Q | T | R | F | Q | P | G | N | L | R | P | N | R | H | L | A | N | I | V | Q | R | V | R | E | V | K | M | G | P | E | D | G | Q | K | R | D | V | C | E |
| Rhino          | H | P | G | G | E | C | S | C | P | V | C | Q | S | R | Y | Q | P | G | T | L | Q | P | N | R | H | L | A | T | I | V | E | R | V | R | E | I | N | T | N | P | R | K | Q | Q | K | E | F | C | E |   |
| Dog            | H | Q | G | E | E | G | T | C | P | V | C | Q | C | K | Y | Q | F | W | N | L | R | P | N | Q | P | L | A | N | I | A | K | K | V | R | E | N | M | - | - | - | S | P | Q | Q | K | K | L | C | E |   |
| Cat            | X | Q | G | G | E | S | N | C | P | V | C | Q | C | R | Y | Q | L | Q | N | L | X | P | N | H | P | L | A | G | I | V | E | R | V | R | E | N | R | - | - | - | S | P | Q | K | K | K | F | C | E |   |
| Manatee        | S | P | G | G | Q | K | S | C | P | V | C | H | A | S | Y | Q | P | G | N | L | W | P | N | Q | H | L | A | K | I | V | K | G | F | R | E | A | K | L | S | P | Q | E | G | Q | K | S | D | R | C | V |
| RhesusMacaque  | I | S | R | G | E | S | S | C | P | V | C | Q | S | R | F | Q | P | G | K | L | R | P | N | R | H | L | A | N | I | V | E | R | V | K | E | V | K | M | S | P | Q | E | G | Q | K | R | D | I | C | E |
| Elephant       | S | Q | E | K | E | S | S | C | P | V | C | R | I | K | Y | Q | P | G | N | L | R | S | N | Q | H | L | A | S | M | V | E | R | L | K | E | V | K | M | S | L | E | K | E | E | K | E | N | Y | C | V |
| Orangutan      | I | S | R | G | E | S | S | C | P | V | C | Q | T | R | F | Q | P | G | N | L | R | P | N | R | H | L | A | N | I | V | E | R | V | K | E | V | K | M | S | P | Q | E | G | Q | K | R | D | V | C | E |
| Gorilla        | I | S | R | G | E | S | S | C | P | V | C | Q | T | R | F | Q | P | G | N | L | R | P | N | R | H | L | A | N | I | V | E | R | V | K | E | V | K | M | S | P | Q | E | G | Q | K | R | D | V | C | E |
| Chimpanzee     | I | S | R | G | E | S | S | C | P | V | C | Q | T | R | F | Q | P | G | N | L | R | P | N | R | H | L | A | N | I | V | E | R | V | K | E | V | K | M | S | P | Q | E | G | Q | K | R | D | V | C | E |

|                |   |   |   |   |   |   |   |   |   |   |   |   |   |   |   |   |   |   |   |   |   |   |   |   |   |   |   |   |   |   |   |   |   |   |   |   |   |   |   |   |   |   |   |   |   |   |   |   |   |   |
|----------------|---|---|---|---|---|---|---|---|---|---|---|---|---|---|---|---|---|---|---|---|---|---|---|---|---|---|---|---|---|---|---|---|---|---|---|---|---|---|---|---|---|---|---|---|---|---|---|---|---|---|
| <u>Human</u>   | H | H | G | K | K | L | Q | I | F | C | K | E | D | G | K | V | I | C | W | V | C | R | L | S | Q | E | H | Q | G | H | Q | T | F | R | I | N | E | V | V | K | E | C | Q | E | K | L | Q | V | A | L |
| Panda          | H | H | G | E | K | L | V | I | F | C | K | E | D | G | K | A | I | C | Q | R | C | A | Q | S | V | E | H | H | G | H | Q | I | F | F | M | E | K | V | I | K | E | C | Q | E | K | L | Q | A | A | L |
| Baboon         | H | H | G | K | K | L | Q | I | F | C | K | E | D | G | K | V | I | C | W | V | C | E | L | S | Q | E | H | Q | G | H | Q | T | F | R | I | N | E | V | V | K | E | C | Q | E | K | L | Q | A | A | L |
| Gibbon         | Q | H | G | K | K | L | Q | I | F | C | K | E | D | G | K | V | I | C | W | V | C | E | L | S | Q | E | H | Q | G | H | Q | T | F | R | I | N | E | V | V | K | E | C | Q | E | R | L | Q | A | A | L |
| SquirrelMonkey | H | H | G | K | K | L | Q | Y | F | C | K | E | D | G | K | V | I | C | W | V | C | R | L | S | Q | E | H | Q | G | H | Q | T | F | L | I | H | E | V | V | K | E | C | Q | E | R | L | Q | A | A | L |
| Rhino          | H | H | G | E | K | L | H | M | F | C | K | D | E | E | Q | A | I | C | R | L | C | V | L | S | R | E | H | Q | G | H | Q | I | F | C | M | E | E | V | M | K | I | Q | E | K | L | Q | E | A | L |   |
| Dog            | V | H | G | E | K | L | L | T | F | C | K | E | D | G | K | A | I | C | Q | H | C | A | Q | S | A | E | H | R | G | H | Q | I | F | F | I | E | K | V | I | K | E | Y | Q | E | K | L | Q | A | A | L |
| Cat            | N | H | G | K | T | L | G | V | F | C | K | E | H | G | K | A | G | C | Q | H | T | A | V | S | Q | E | Y | H | G | H | H | I | F | L | T | E | K | V | V | K | E | C | Q | E | K | L | Q | A | T | L |
| Manatee        | H | H | G | E | K | L | L | L | F | C | K | N | D | E | K | V | I | C | W | L | C | V | R | S | Q | E | H | C | G | H | Q | T | F | L | V | E | E | V | V | K | E | C | Q | E | K | L | Q | E | T | L |
| RhesusMacaque  | H | H | G | E | K | L | Q | I | F | C | K | E | D | G | K | V | I | C | W | V | C | E | L | S | Q | E | H | Q | G | H | Q | T | F | R | I | N | E | V | V | K | E | C | Q | E | K | L | Q | A | A | L |
| Elephant       | H | H | G | E | K | L | R | L | F | C | K | L | D | G | K | F | I | C | W | L | C | E | S | Q | E | H | G | H | P | T | F | L | V | E | E | V | V | P | E | Y | Q | E | K | N | L | Q | A | A | F |   |
| Orangutan      | H | H | G | K | K | L | Q | I | F | C | K | E | D | G | K | V | I | C | W | V | C | E | L | S | Q | E | H | Q | G | H | Q | T | F | R | I | N | E | V | V | K | E | C | Q | E | K | L | Q | V | A | L |
| Gorilla        | H | H | G | K | K | L | Q | I | F | C | K | E | D | G | K | V | I | C | W | V | C | E | L | S | Q | E | H | Q | G | H | Q | T | F | R | I | N | E | V | V | K | E | C | Q | E | K | L | Q | V | A | L |
| Chimpanzee     | F | H | G | K | K | L | Q | I | F | C | K | E | D | G | K | V | I | C | W | V | C | E | L | S | P | E | H | Q | G | H | Q | T | F | R | I | N | E | V | V | K | E | C | Q | E | K | L | Q | V | A | L |

|              |   |   |   |   |   |   |   |   |   |   |   |   |   |   |   |   |   |   |   |   |   |   |   |   |   |   |   |   |   |   |   |   |   |   |   |   |   |   |   |   |   |   |   |   |   |   |   |   |   |   |
|--------------|---|---|---|---|---|---|---|---|---|---|---|---|---|---|---|---|---|---|---|---|---|---|---|---|---|---|---|---|---|---|---|---|---|---|---|---|---|---|---|---|---|---|---|---|---|---|---|---|---|---|
| <u>Human</u> | Q | R | L | I | K | E | D | Q | E | A | E | K | L | E | D | D | I | R | Q | E | R | T | A | W | K | N | Y | I | Q | I | E | R | Q | K | I | L | K | G | F | N | E | M | R | V | I | L | D | N | E | E |
| Panda        | K | K | L | R | K | E | E | P | K | M | E | E | W | E | A | D | I | R | E | E | K | A | S | W | K | N | H | M | Q | T | E | R | Q | R | I | L | K | G | F | N | E | M | K | A | I | L | D | S | E | E |
| Baboon       | Q | K | L | T | K | E | D | Q | E | A | E | K | L | E | D | D | I | R | Q | E | R | T | I | W | K | N | Y | I | Q | I | E | R | Q | K | I | L | K | G | F | N | E | M | R | V | I | L | D | S | E | E |
| Gibbon       | Q |   |   |   |   |   |   |   |   |   |   |   |   |   |   |   |   |   |   |   |   |   |   |   |   |   |   |   |   |   |   |   |   |   |   |   |   |   |   |   |   |   |   |   |   |   |   |   |   |   |

Chimpanzee

Q R L I K E D Q E A E K L E D D I R Q E R T A W K N Y I Q I E R Q K I L K G F N E M R V I L D N E E

Human

Q R E L Q K L E E G E V N V L D N L A A A T D Q L V Q Q R Q D A S T L I S D L Q R R L R G S S V E M

Panda

K R V L Q K L E E D E V N V L D N L V V A K D Q L A R Q Q C L R E L I S A V E H Q I W G S S V D T

Baboon

Q R E L Q K L E E G E V N V L D N L A A A S D Q L V Q Q R Q D A S K L I S D L Q R R L R G S S I E M

Gibbon

Q R E L Q K L E E G E V N V L D N L A A A T D Q L V Q Q R Q D A S K L I S D L Q R R L R G S S V E M

SquirrelMonkey

Q R E L Q K L E E G E V N V L D N L A E A K D Q L V Q Q R Q Y A S K L I S D L Q R R I K G S S V E M

Rhino

Q K E L Q K L E E D E V N V L D N L V A A K D Q L V Q Q S Q Y M R E L I S D L E R Q M W G S S I D T

Dog

K K V L Q K L E E D E V N V L D N L I V A R D Q L D W Q R Q Y L R G L I S H I E H Q I W G S S V D T

Cat

K R V L Q K L E E D K V N V L D N L V V A R D Q L D W Q R Q Y L R G L I S H I E H Q I W G S S E D M

Manatee

K R E L Q K L E E E E V N V L D N L A E V K Y Q L I Q Q Y Q D L S D L I S D V E H R M Q W S S V D T

RhesusMacaque

Q R E L Q K L E E G E V N V L D N L A A A R D Q L V Q Q R Q D A S K L I S D L Q R R L R G S S I E M

Elephant

Q K E L E E L K S E E E S V M Q N L S E A E N E L G Q Q S D D V K K L M S D L Q H R L Q G T T M E M

Orangutan

Q R E L Q K L E E G E V N V L D N L A A A T D Q L V Q Q R Q D A S T L I S D L Q R R L R G S S V E M

Gorilla

Q R E L Q K L E E G E V N V L D N L A A A T D Q L V Q Q R Q D A S T L I S D L Q R R L R G S S V E M

Chimpanzee

Q R E L Q K L E E G E V N V L D N L A A A T D Q L V Q Q R Q D A S T L I S D L Q R R L R G S S V E M

Human

L Q D V I D V M K R S E S W T L K K P K S V S K K L K S V F R V P D L S G M L Q V L K E L T D V Q Y

Panda

V Q D M I N V M K R S E S W T L K K P N T A S K K L K S V F R V P D L S G M L Q V F K E L T E V Q R

Baboon

L Q D V I D V M K R S E S W T L K K P K P V S K K L K S V F R A P D L S R M L Q V H K E L T D V Q C

Gibbon

L Q D V I D V M K R S E S W T L K K P K S V S K K L K S V F R V P D L S G M L Q V L K E L T D V Q Y

SquirrelMonkey

L Q D V I D V M R S E T W I L K K P K S V S K K L K S I F Q M P D L S G M L Q I L R E L T D V Q C

Rhino

L R D V I N L I R R S E T W T L K K P K M V S K K Q K S A F R V P D L S G M L Q V F K E L T E V Q C

Dog

V Q D M I N V M K R S E S W T L K K P N I V S K K L K S T F L I P D L S G M L Q V F K E L T E V Q C

Cat

L Q D L I N V M R K S E S W I L K K P H I V S K K S K S T Y Q I P D L K G T L Q M F K E L T E V Q R

Manatee

M Q D V I D I V K R S E S W T L K K P T I V S K K L K N V C R V P D L K E I L Q V F R E L T D V Q C

RhesusMacaque

L Q D V I D V M K R S E S W T L K K P K P V S K K L K S V F R A P D L S R M L Q V H K E L T D V Q C

Elephant

L Q D V N D V I Q G S K N T I L E K P K T L P Q K P R R I F Q V P D M S L I L C V M R E L E D V Q R

Orangutan

L Q D V I D V M K R S E S W T L K K P K S V S K K L K S V F R V P D L S G M L Q V L K E L T D V Q Y

Gorilla

L Q D V I D V M K R S E S W T L K K P K S V S K K L K S V F R V P D L S G M L Q V L K E L T D V Q Y

Chimpanzee

L Q D V I D V M K R S E S W T L K K P K S V S K K L K S V F R V P D L S G M L Q V L K E L T D V Q Y

Human

Y W V D V M L N P G S A T S N V A I S V D Q R Q V K T V R T C T F K N S N - P C D F S A F G V F G C

Panda

Y W V D V M L K P V N A I S N I A I S A D K R Q V T A V H N L S L K N I F - L C D F S A F D I L G C

Baboon

H W V D V M L N P N S T I S N V A V S V D Q R Q V A T V R T F A F K N S N - P R D F S D F G V L G C

Gibbon

Y W V D V M L N P V S A T S N V A V S A D Q R Q V K T V R T C T F K N S N - P C D F S A F G V F G C

SquirrelMonkey

Y W V D V M L N P D S A T L N V A V S A D Q R Q V A T V H T S T F K N S N - P R D F S A F G V L G C

Rhino

Y W V D V M L N P V N A I S N I V I S A D Q R Q V K I L H P F T F R N V Y - P C D F S A F D V L G C

Dog

Y W V D V M L K P V N A I S N I T I S A D K R Q V T V V H N F P L K S I Y - P F D F S A F D I L G C

Cat

Y W V D V M L K P V N A I L N I T I S A D K R Q V K G I Q D F S L Q N I H - L C S F P L F D V L G C

Manatee

Y W V D V T L N Q V N T S S N V V I S A D Q R Q V A V L R I P N F R N S D - Q H D F S A F D V L G C

RhesusMacaque

Y W V D V M L N P N S T I S N V A V S V D Q R Q V A T V R T F T F K N S N - P R D F S D F G V L G C

Elephant

Y W V N M T L N P I N P I S N V V I S E G G R Q A R I V P N S K S R N F C W S G S N D D D G I V G C

Orangutan

Y W V D V M L N P G S A T S N V A V S V D Q R Q V K T V R T C T F K N S N - P C D F S A F G V F G C

Gorilla

Y W V D V M L N P G S A T S N V A I S V D Q R Q V K T V H T C T F K N S N - P C D F S A F G V F G C

Chimpanzee

Y W V D V M L N P G S A T S N V A I S V D Q R Q V K T V R T C T F K N S N - P C D F S A F G V F G C

Human

Q Y F S S G K Y Y W E V D V S G K I A W I L G V H S K I S S L N K R K S S G F A F D P S V N Y S K V

Panda

Q H F S S G K Y Y W E V D V S E K T A W I L G V Y S K A R N L K R K G S S G F V F D P N V N H P D V

Baboon

Q H F S S G K Y Y W E V D V S G K I A W I L G V Y S K I S S P N K R K S S G F V F D P S V N Y A N V

Gibbon

Q Y F S S G K Y Y W E V D V S G K I A W I L G V H S K I S S L N K R K S S G F A F D P S V N Y S K V

SquirrelMonkey

Q H F S S G K Y Y W E V D V S G K S A W I L G V H S K I S N P N K R K S S G F T F D T S T N Y S S I

Rhino

Q C F S S G K Y Y W E V D V S G K I A W I L G V C S N K R C F N R T K S S G F T F D P N L N H S N V

Dog

Q H F S S G K Y Y W E V D V S G K I A W I L G V Y S K G R S L K R K G D S G F F F D P K V N H L D V

Cat

Q H F S X G K Y Y W E V D V S E K I S W I L G V N S K A R S P K R K G S S G F V F D P N V N Y L P D V

Manatee

Q Y F S S G K H Y W E V D V S R K T A W I L G V Y C R A K D P H E R W A S V F A F G L N V S S Q N V

RhesusMacaque

Q Y F S S G K Y Y W E V D V S G K I A W I L G V Y S K I S S P N K R K S S G F V F D P S V N Y A N V

Elephant

L Y I A S G K H Y W E V D V S G K T S W I L G V C S D R C P E - - - F S M L G A K Q G V Y L Q N D

Orangutan

Q Y F S S G K Y Y W E V D V S G K I A W I L G V H S K I S S L N K R K S S G L A F D P S V N Y S K V
